# Supplementary material
Source: PubMed Central journal article supplement (PMC8093896)
Supplement: mmc2.pdf [file mmc2.pdf]

## Supplementary figure

**Figure S1.** A time-resolved evolutionary rate estimation for SARS-CoV-2 in patients with prolonged viral infectivity (patient 2 and patient 3). Collection date for each sample is shown on the x-axis. For patient 2, the estimated evolutionary rate was  $2.01 \times 10^{-4}$  substitutions per site. For patient 3, the estimated evolutionary rate was  $1.38 \times 10^{-3}$ . The mutation rate is calculated based on differences in major and not minor variants, relative to the consensus difference.

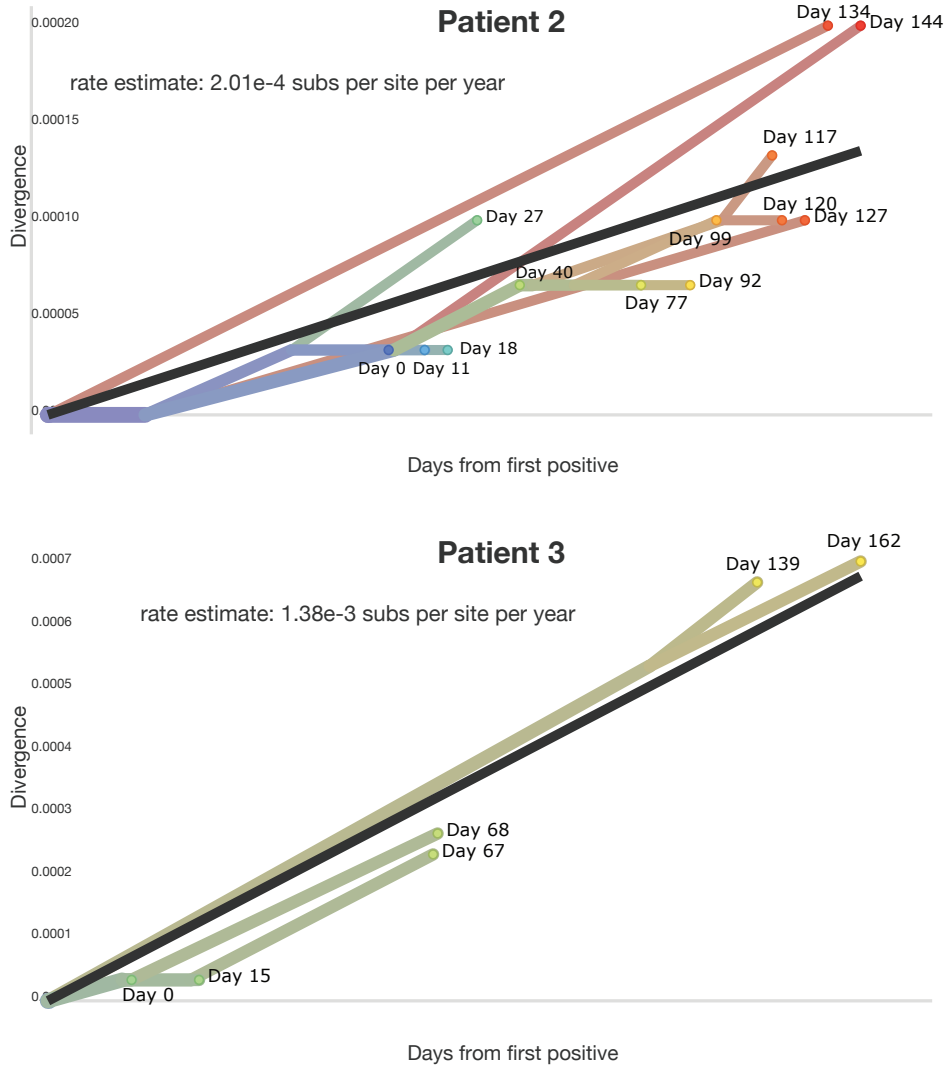

## Supplementary tables

**Table S1.** RT-PCR assay values for detection of SARS-CoV-2 from nasopharyngeal or combined nares/oropharyngeal swabs collected from each patient. Corresponding viral culture assay results are also shown.

| Patient | Day           | Routine RT-PCR |                                   | Strand-specific RT-PCR |                | Subgenomic RT-PCR Ct | Viral culture |
|---------|---------------|----------------|-----------------------------------|------------------------|----------------|----------------------|---------------|
|         |               | Assay used     | Cycle threshold (Ct) <sup>a</sup> | Minus strand Ct        | Plus strand Ct |                      |               |
| 1       | 0             | Thermo Fisher  | 15.9                              | 25.2                   | 17.5           | 22.9                 | Positive      |
|         | 13            | Thermo Fisher  | 26.2                              |                        |                |                      | Negative      |
|         | 27            | CDC            | 33.3                              |                        |                |                      |               |
|         | 34            | Thermo Fisher  | 29.0                              | UND                    | 34.1           | UND                  |               |
|         | 40            | Thermo Fisher  | 30.7                              | UND                    | 34.1           | UND                  |               |
|         | 46            | Thermo Fisher  | 30.7                              | UND                    | 35.1           | UND                  | Negative      |
|         | 91            | Cepheid        | UND                               |                        |                |                      |               |
|         | 116           | Thermo Fisher  | UND                               | UND                    | UND            | UND                  | Negative      |
|         | 117           | Thermo Fisher  | 37.5                              | UND                    | UND            | UND                  | Negative      |
|         | 145           | Thermo Fisher  | UND                               |                        |                |                      |               |
| 2       | 0             | CDC            | 20.7                              | 31.7                   | 20.2           | 26.2                 | Positive      |
|         | 11            | Thermo Fisher  | 21.4                              | 29.5                   | 22.3           | 29.6                 | Positive      |
|         | 18            | Thermo Fisher  | 16.6                              | 23.9                   | 17.6           | 23.6                 |               |
|         | 27            | Thermo Fisher  | 16.2                              |                        |                |                      | Positive      |
|         | 40            | Thermo Fisher  | 26.1                              |                        |                |                      |               |
|         | 53            | Diasorin       | 23.4 / 23.4                       |                        |                |                      |               |
|         | 65            | Diasorin       | 23.1 / 22.8                       | 35.3                   | 24.6           | 33.8                 |               |
|         | 77            | Thermo Fisher  | 21.8                              |                        |                |                      |               |
|         | 92            | Thermo Fisher  | 17.7                              | 28.5                   | 19.0           | 25.7                 |               |
|         | 99            | Thermo Fisher  | 20.2                              | 29.5                   | 21.8           | 27.8                 | Positive      |
|         | 117           | Thermo Fisher  | 19.3                              |                        |                |                      | Positive      |
|         | 120           | Thermo Fisher  | 18.5                              | 27.5                   | 20.8           | 25.6                 | Positive      |
|         | 127           | Thermo Fisher  | 28.1                              | UND                    | 27.7           | 36.8                 | Positive      |
|         | 130           | Thermo Fisher  | 23.6                              |                        |                |                      |               |
|         | 134           | Thermo Fisher  | 20.9                              | 28.9                   | 22.5           | 29.3                 | Positive      |
| 137     | Thermo Fisher | 17.2           | 24.1                              | 19.8                   | 23.4           | Positive             |               |
| 144     | Thermo Fisher | 21.6           | 30.7                              | 24.3                   | 31.2           | Positive             |               |
| 156     | Thermo Fisher | 24.8           |                                   |                        |                |                      |               |
| 172     | Thermo Fisher | 23.1           |                                   |                        |                |                      |               |
| 3       | 0             | CDC            | 16.0                              | 23.4                   | 17.5           | 25.0                 | Positive      |
|         | 11            | CDC            | 22.5                              |                        |                |                      |               |
|         | 15            | Thermo Fisher  | 23.5                              | 39.3                   | 25.5           | 31.9                 | Negative      |

|  |                  |               |             |      |      |      |          |
|--|------------------|---------------|-------------|------|------|------|----------|
|  | 22               | Thermo Fisher | 21.8        | 32.1 | 24.2 | 32.9 | Positive |
|  | 36               | Diasorin      | 19.8 / 19.2 |      |      |      |          |
|  | 43               | Diasorin      | 21.2 / 22.3 |      |      |      |          |
|  | 67               | Thermo Fisher | 19.2        | 26.7 | 20.8 | 27.0 | Negative |
|  | 68               | Thermo Fisher | 21.9        | 30.7 | 22.8 | 31.4 |          |
|  | 139              | Thermo Fisher | 23.0        | 36.7 | 33.5 | 33.0 | Positive |
|  | 162 <sup>b</sup> | Thermo Fisher | 20.0        | 35.8 | 23.0 | 27.4 | Negative |
|  | 196              | Thermo Fisher | UND         |      |      |      |          |

UND, undetected

<sup>a</sup> Ct values for the Thermo Fisher Taqpath COVID-19 RT-PCR N target, CDC 2019-Novel Coronavirus Real-Time RT-PCR N1 target, Cepheid Xpert Xpress SARS-CoV-2 E and N2 targets, and Diasorin Simplexa S and ORF1ab targets.

<sup>b</sup> All specimens were collected with a nasopharyngeal swab except for the day 162 specimen from patient 3, which was collected with a combined nares and oropharyngeal swab.

**Table S2. Major and minor allele frequency variants in patient 1.** Variants with allele frequency below 25% were filtered out. Most samples were processed on an additional platform to verify the variant calls. Variant calls confirmed by another platform are marked in bold. Patient 1, Day 27 sample with a low depth of coverage from Paragon run was replaced with AmpliSeq data. PAF = population allele frequency of variant in over 80,000 complete genome sequences in the Children’s Hospital Los Angeles COVID-19 Analysis Research Database (CARD), extracted from and kept updated based on GIDAID, NCBI, and Nextstrain.<sup>1</sup>

| Variant   |              | Gene        | Day         |             |             | PAF    |
|-----------|--------------|-------------|-------------|-------------|-------------|--------|
|           |              |             | 0           | 13          | 27          |        |
| 241:C/T   | .            | 5UTR_orf1ab | <b>1</b>    | <b>1</b>    | <b>0.99</b> | 0.001  |
| 1059:C/T  | p.Thr265Ile  | orf1ab      | <b>0.99</b> | <b>1</b>    | <b>0.99</b> | 0.48   |
| 3037:C/T  | p.Phe924Phe  | orf1ab      | <b>1</b>    | <b>1</b>    | <b>0.96</b> | 0.916  |
| 3042:C/T  | p.Pro926Leu  | orf1ab      | <b>1</b>    | <b>0.99</b> | <b>1</b>    | <0.001 |
| 9967:C/T  | p.Leu3234Leu | orf1ab      | <b>1</b>    | <b>1</b>    | <b>1</b>    | 0.002  |
| 11514:C/T | p.Thr3750Ile | orf1ab      | <b>1</b>    | .           | .           | 0.001  |
| 14408:C/T | p.Pro4715Leu | orf1ab      | <b>1</b>    | <b>1</b>    | <b>0.99</b> | 0.916  |
| 21777:G/A | p.Gly72Glu   | S           | <b>1</b>    | <b>1</b>    | <b>0.98</b> | <0.001 |
| 22792:C/A | p.Ile410Ile  | S           | <b>1</b>    | <b>1</b>    | <b>0.49</b> | <0.001 |
| 23403:A/G | p.Asp614Gly  | S           | <b>1</b>    | <b>1</b>    | <b>1</b>    | 0.920  |
| 24770:G/T | p.Ala1070Ser | S           | <b>1</b>    | <b>1</b>    | <b>0.99</b> | <0.001 |
| 25563:G/T | p.Gln57His   | ORF3a       | <b>1</b>    | <b>0.99</b> | <b>0.99</b> | 0.221  |
| 27964:C/T | p.Ser24Leu   | ORF8        | <b>1</b>    | <b>1</b>    | <b>1</b>    | 0.042  |
| 28824:C/T | p.Ser184Phe  | N           | <b>1</b>    | <b>1</b>    | <b>0.99</b> | <0.001 |

**Table S3. Major and minor allele frequency variants in patient 2.** Variants with allele frequency below 25% were filtered out. Most samples were processed on an additional platform to verify the variant calls. Variant calls confirmed by another platform are marked in bold. PAF = population allele frequency of variant in over 80,000 complete genome sequences in the Children’s Hospital Los Angeles COVID-19 Analysis Research Database (CARD), extracted from and kept updated based on GIDAID, NCBI, and Nextstrain.<sup>1</sup>

| Variant   | Gene         | Day         |          |          |          |             |             |             |             |             |             |             |             |             |          |          | PAF    |        |
|-----------|--------------|-------------|----------|----------|----------|-------------|-------------|-------------|-------------|-------------|-------------|-------------|-------------|-------------|----------|----------|--------|--------|
|           |              | 0           | 11       | 18       | 27       | 40          | 77          | 92          | 99          | 117         | 120         | 127         | 134         | 137         | 144      |          |        |        |
| 241:C/T   | 5UTR_orflab  | <b>0.99</b> | <b>1</b> | <b>1</b> | <b>1</b> | <b>1</b>    | <b>1</b>    | <b>1</b>    | <b>1</b>    | <b>1</b>    | <b>1</b>    | <b>1</b>    | <b>1</b>    | <b>1</b>    | <b>1</b> | <b>1</b> | 0.889  |        |
| 498:C/T   | p.Thr78Ile   | orflab      | .        | .        | .        | .           | .           | .           | .           | .           | .           | .           | .           | .           | .        | .        | 0.47   | <0.001 |
| 509:G/A   | p.Gly82Ser   | orflab      | .        | .        | .        | .           | .           | .           | .           | .           | <b>0.74</b> | <b>0.39</b> | .           | .           | .        | .        | <0.001 |        |
| 521:G/A   | p.Val86Ile   | orflab      | .        | .        | .        | .           | .           | .           | .           | <b>0.47</b> | .           | .           | .           | .           | .        | .        | <0.001 |        |
| 2939:C/G  | p.Pro892Ala  | orflab      | .        | .        | .        | .           | .           | .           | .           | .           | .           | .           | .           | <b>0.95</b> | .        | 0.48     | <0.001 |        |
| 3037:C/T  | p.Phe924Phe  | orflab      | <b>1</b> | <b>1</b> | <b>1</b> | <b>1</b>    | <b>1</b>    | <b>1</b>    | <b>1</b>    | <b>1</b>    | <b>0.99</b> | <b>1</b>    | <b>0.99</b> | <b>1</b>    | <b>1</b> | <b>1</b> | 0.916  |        |
| 3523:A/G  | p.Glu1086Glu | orflab      | .        | .        | .        | .           | .           | .           | .           | .           | .           | .           | <b>0.43</b> | .           | 0.75     | .        | <0.001 |        |
| 7315:T/C  | p.Phe2350Phe | orflab      | <b>1</b> | <b>1</b> | <b>1</b> | <b>1</b>    | <b>1</b>    | <b>1</b>    | <b>1</b>    | <b>1</b>    | <b>1</b>    | <b>1</b>    | <b>1</b>    | <b>1</b>    | <b>1</b> | <b>1</b> | 0.99   | <0.001 |
| 8290:C/T  | p.Leu2675Leu | orflab      | .        | .        | .        | .           | .           | .           | .           | .           | .           | .           | .           | .           | .        | .        | 0.57   | 0.001  |
| 8327:C/T  | p.Leu2688Phe | orflab      | .        | .        | .        | .           | .           | .           | .           | .           | <b>0.33</b> | .           | .           | .           | .        | .        | 0.001  |        |
| 9711:C/T  | p.Ser3149Phe | orflab      | .        | .        | .        | .           | .           | .           | .           | .           | .           | .           | .           | <b>0.95</b> | .        | 0.44     | <0.001 |        |
| 10029:C/T | p.Thr3255Ile | orflab      | .        | .        | .        | .           | .           | .           | .           | .           | .           | .           | <b>0.64</b> | .           | 0.99     | .        | 0.001  |        |
| 10319:C/T | p.Leu3352Phe | orflab      | .        | .        | .        | .           | .           | .           | .           | .           | <b>0.53</b> | .           | .           | .           | .        | .        | 0.024  |        |
| 10834:C/T | p.Ala3523Ala | orflab      | .        | .        | .        | <b>0.61</b> | .           | .           | .           | .           | .           | .           | .           | .           | .        | .        | 0.001  |        |
| 11230:G/T | p.Met3655Ile | orflab      | .        | .        | .        | .           | <b>0.99</b> | <b>0.78</b> | <b>0.99</b> | <b>0.96</b> | <b>0.93</b> | <b>0.99</b> | <b>0.36</b> | .           | .        | 0.58     | 0.009  |        |
| 12008:C/T | p.Leu3915Phe | orflab      | .        | .        | .        | .           | .           | .           | <b>0.40</b> | <b>0.28</b> | <b>0.85</b> | <b>0.94</b> | 0.25        | .           | .        | .        | <0.001 |        |

|                                                |                                  |                |             |          |          |             |             |             |             |             |             |             |             |             |             |          |          |            |
|------------------------------------------------|----------------------------------|----------------|-------------|----------|----------|-------------|-------------|-------------|-------------|-------------|-------------|-------------|-------------|-------------|-------------|----------|----------|------------|
| 14313:T/<br>C                                  | p.Asp468<br>3<br>Asp             | orf1ab         | .           | .        | .        | .           | .           | .           | .           | .           | .           | .           | .           | .           | <b>0.72</b> | .        | 0.43     | 0.001      |
| 14408:C/<br>T                                  | p.Pro471<br>5<br>Leu             | orf1ab         | <b>0.99</b> | <b>1</b> | <b>1</b> | <b>1</b>    | <b>1</b>    | <b>1</b>    | <b>1</b>    | <b>1</b>    | <b>1</b>    | <b>1</b>    | <b>1</b>    | <b>1</b>    | <b>1</b>    | <b>1</b> | 0.99     | 0.916      |
| 14809:C/<br>T                                  | p.Arg484<br>9<br>Cys             | orf1ab         | .           | .        | .        | .           | <b>0.98</b> | <b>0.74</b> | <b>0.98</b> | <b>0.96</b> | <b>0.92</b> | <b>0.99</b> | <b>0.36</b> | .           | .           | .        | .        | <0.00<br>1 |
| 15828:A/<br>C                                  | p.Glu518<br>8<br>Asp             | orf1ab         | .           | .        | .        | .           | .           | .           | .           | .           | <b>0.37</b> | <b>0.28</b> | .           | .           | .           | .        | .        | <0.00<br>1 |
| 16877:C/<br>T                                  | p.Thr553<br>8Ile                 | orf1ab         | .           | .        | .        | .           | .           | .           | .           | .           | .           | .           | .           | .           | .           | .        | 0.59     | <0.00<br>1 |
| 20384:C/<br>T                                  | p.Ala670<br>7<br>Val             | orf1ab         | .           | .        | .        | <b>0.46</b> | .           | .           | .           | .           | .           | .           | .           | <b>0.68</b> | .           | 0.98     | .        | <0.00<br>1 |
| 21627:C/<br>T                                  | p.Thr221I<br>e                   | S              | .           | .        | .        | .           | .           | .           | .           | .           | .           | .           | .           | .           | .           | .        | 0.60     | 0.001      |
| 21846:C/<br>T                                  | p.Thr951I<br>e                   | S              | .           | .        | .        | .           | .           | .           | .           | .           | .           | .           | .           | <b>0.51</b> | .           | 0.76     | .        | 0.002      |
| 21981:T<br>TTTGG<br>GTGTT<br>TA/T <sup>a</sup> | p.Leu141<br>_Tyr144d<br>el       | S              | .           | .        | .        | .           | .           | .           | .           | .           | .           | .           | .           | .           | .           | .        | 0.78     | <0.00<br>1 |
| 21990:T<br>TTA/T <sup>a</sup>                  | p.Tyr145<br>del                  | S              | .           | .        | .        | .           | .           | .           | .           | .           | .           | .           | <b>0.43</b> | <b>0.33</b> | <b>0.97</b> | .        | 0.44     | <0.00<br>1 |
| 22193:A<br>ATT/A                               | p.Asn211<br>_Leu212de<br>linsIle | S              | .           | .        | .        | .           | .           | .           | .           | .           | .           | .           | .           | .           | <b>0.57</b> | .        | 0.95     | <0.00<br>1 |
| 22264:C/<br>T                                  | p.Asn234<br>Asn                  | S              | .           | .        | .        | .           | .           | .           | .           | .           | .           | .           | .           | .           | .           | .        | 0.58     | 0.001      |
| 23403:A/<br>G                                  | p.Asp614<br>Gly                  | S              | <b>1</b>    | <b>1</b> | <b>1</b> | <b>1</b>    | <b>1</b>    | <b>1</b>    | <b>1</b>    | <b>1</b>    | <b>1</b>    | <b>1</b>    | <b>1</b>    | <b>1</b>    | <b>1</b>    | <b>1</b> | <b>1</b> | 0.920      |
| 24138:C/<br>A                                  | p.Thr859<br>Asn                  | S              | .           | .        | .        | .           | .           | .           | .           | .           | <b>0.34</b> | <b>0.29</b> | .           | .           | .           | .        | .        | 0.001      |
| 25904:C/<br>T                                  | p.Ser171<br>Leu                  | ORF3a          | .           | .        | .        | .           | .           | .           | .           | .           | .           | .           | .           | .           | <b>0.76</b> | .        | 0.36     | 0.004      |
| 26511:T/<br>C                                  |                                  | E-M            | .           | .        | .        | .           | .           | .           | .           | .           | .           | .           | .           | <b>0.49</b> | .           | 0.98     | .        | <0.00<br>1 |
| 27112:G/<br>C                                  | p.Ser197<br>Thr                  | M              | .           | .        | .        | .           | .           | .           | .           | .           | .           | .           | .           | .           | <b>0.53</b> | .        | 0.29     | <0.00<br>1 |
| 27707:C/<br>T                                  | p.Ala105<br>Val                  | ORF7a          | .           | .        | .        | .           | <b>0.94</b> | <b>0.99</b> | <b>1</b>    | <b>1</b>    | <b>1</b>    | <b>1</b>    | <b>0.99</b> | <b>0.98</b> | <b>1</b>    | 0.98     | 0.98     | 0.001      |
| 28321:G/<br>A                                  | p.Thr16T<br>hr                   | N              | .           | .        | .        | .           | .           | <b>0.36</b> | .           | .           | .           | .           | .           | .           | <b>0.77</b> | .        | 0.96     | 0.001      |
| 29679:C/<br>T                                  |                                  | ORF10<br>_3UTR | .           | .        | .        | .           | .           | .           | .           | .           | .           | <b>0.29</b> | .           | .           | .           | .        | .        | <0.00<br>1 |
| 29700:A/<br>T                                  |                                  | ORF10<br>_3UTR | .           | .        | .        | .           | .           | .           | .           | .           | .           | .           | .           | .           | .           | 0.85     | .        | <0.00<br>1 |

|               |  |                |  |  |  |             |  |  |  |  |  |  |  |  |  |  |  |  |  |       |
|---------------|--|----------------|--|--|--|-------------|--|--|--|--|--|--|--|--|--|--|--|--|--|-------|
| 29742:G/<br>T |  | ORF10<br>_3UTR |  |  |  | <b>0.53</b> |  |  |  |  |  |  |  |  |  |  |  |  |  | 0.003 |
|---------------|--|----------------|--|--|--|-------------|--|--|--|--|--|--|--|--|--|--|--|--|--|-------|

<sup>a</sup> Leu141\_Tyr144del and Tyr145del are in a region where similar mutations have been found in other immunocompromised patients.<sup>2,3</sup>

**Table S4. Major and minor allele frequency variants in patient 3.** Variants with allele frequency below 25% were filtered out. Most samples were processed on an additional platform to verify the variant calls. Variant calls confirmed by another platform are marked in bold. PAF = population allele frequency of variant in over 80,000 complete genome sequences in the Children’s Hospital Los Angeles COVID-19 Analysis Research Database (CARD), extracted from and kept updated based on GIDAID, NCBI, and Nextstrain.<sup>1</sup>

| Variant        | Gene                 | Day      |             |             |             |             |             | PAF    |
|----------------|----------------------|----------|-------------|-------------|-------------|-------------|-------------|--------|
|                |                      | 0        | 15          | 67          | 68          | 139         | 162         |        |
| 241:C/T        | 5UTR_<br>orf1ab      | <b>1</b> | <b>1</b>    | <b>1</b>    | <b>1</b>    | <b>1</b>    | <b>1</b>    | 0.889  |
| 379:C/A        | p.Val38<br>Val       | <b>1</b> | <b>0.99</b> | <b>1</b>    | <b>0.99</b> | <b>1</b>    | <b>1</b>    | 0.003  |
| 635:C/T        | p.Arg12<br>4Cys      | .        | .           | .           | .           | .           | <b>0.44</b> | <0.001 |
| 1059:C/T       | p.Thr265<br>Ile      | <b>1</b> | <b>0.99</b> | <b>0.99</b> | <b>0.99</b> | <b>1</b>    | <b>1</b>    | 0.148  |
| 1753:T/C       | p.Tyr496<br>Tyr      | .        | .           | .           | .           | .           | <b>0.47</b> | <0.001 |
| 2424:G/T       | p.Cys72<br>0<br>Phe  | .        | .           | .           | .           | .           | <b>0.51</b> | <0.001 |
| 2655:A/C       | p.Glu79<br>7<br>Ala  | .        | .           | .           | .           | <b>1</b>    | <b>1</b>    | <0.001 |
| 3037:C/T       | p.Phe92<br>4<br>Phe  | <b>1</b> | <b>1</b>    | <b>1</b>    | <b>1</b>    | <b>1</b>    | <b>1</b>    | 0.916  |
| 3421:A/G       | p.Val105<br>2<br>Val | .        | .           | .           | .           | <b>1</b>    | <b>1</b>    | <0.001 |
| 4763:C/T       | p.His150<br>0<br>Tyr | .        | .           | .           | .           | <b>1</b>    | <b>1</b>    | <0.001 |
| 4891:C/T       | p.Thr154<br>2<br>Thr | .        | .           | .           | <b>0.62</b> | .           | .           | <0.001 |
| 9165:C/T       | p.Thr296<br>7Ile     | .        | .           | .           | .           | <b>1</b>    | <b>1</b>    | 0.001  |
| 10276:A/<br>G  | p.Gln33<br>37<br>Gln | .        | .           | .           | .           | .           | <b>0.49</b> | <0.001 |
| 11082:TG<br>/T | p.Leu36<br>06fs      | .        | .           | .           | .           | .           | 0.27        | <0.001 |
| 11083:G/<br>T  | p.Leu36<br>06<br>Phe | .        | .           | .           | .           | <b>0.47</b> | <b>0.73</b> | 0.065  |
| 11270:A/<br>G  | p.Met36<br>69<br>Val | .        | .           | .           | .           | <b>1</b>    | <b>1</b>    | <0.001 |
| 12025:C/<br>T  | p.Ser392<br>0<br>Ser | <b>1</b> | <b>1</b>    | <b>1</b>    | <b>1</b>    | <b>1</b>    | <b>1</b>    | 0.002  |

|                                             |                                |        |             |          |             |             |             |             |        |
|---------------------------------------------|--------------------------------|--------|-------------|----------|-------------|-------------|-------------|-------------|--------|
| 13860:C/<br>T                               | p.Asp45<br>32<br>Asp           | orflab | .           | .        | .           | <b>0.62</b> | .           | .           | 0.001  |
| 14408:C/<br>T                               | p.Pro471<br>5<br>Leu           | orflab | <b>0.99</b> | <b>1</b> | <b>1</b>    | <b>1</b>    | <b>1</b>    | <b>1</b>    | 0.916  |
| 15714:C/<br>T                               | p.Leu51<br>50<br>Leu           | orflab | .           | .        | .           | .           | .           | <b>0.51</b> | <0.001 |
| 16014:G/<br>T                               | p.Arg52<br>50<br>Arg           | orflab | .           | .        | .           | <b>0.59</b> | .           | .           | <0.001 |
| 16374:T/<br>C                               | p.Asn53<br>70<br>Asn           | orflab | .           | .        | .           | .           | <b>0.99</b> | <b>0.51</b> | <0.001 |
| 16421:A/<br>G                               | p.Gln53<br>86<br>Arg           | orflab | .           | .        | .           | <b>0.41</b> | .           | .           | <0.001 |
| 16466:C/<br>T                               | p.Pro540<br>1<br>Leu           | orflab | .           | .        | .           | <b>0.44</b> | .           | .           | <0.001 |
| 16949:C/<br>T                               | p.Pro556<br>2<br>Leu           | orflab | .           | .        | .           | <b>0.60</b> | .           | .           | <0.001 |
| 17278:G/<br>T                               | p.Val567<br>2<br>Leu           | orflab | .           | .        | .           | <b>0.40</b> | .           | .           | 0.002  |
| 17895:T/<br>C                               | p.Ala587<br>7<br>Ala           | orflab | .           | .        | .           | .           | <b>1</b>    | <b>0.56</b> | <0.001 |
| 18318:G/<br>T                               | p.Gly60<br>18<br>Gly           | orflab | .           | .        | .           | .           | .           | <b>0.37</b> | <0.001 |
| 18870:T/<br>A                               | p.Thr620<br>2<br>Thr           | orflab | .           | .        | .           | .           | <b>1</b>    | <b>1</b>    | <0.001 |
| 19398:G/<br>T                               | p.Glu63<br>78<br>Asp           | orflab | .           | .        | <b>0.99</b> | .           | .           | .           | <0.001 |
| 21600:G/<br>T                               | p.Ser131<br>e                  | S      | .           | .        | .           | .           | <b>1</b>    | <b>1</b>    | 0.001  |
| 21658:C/<br>T                               | p.Phe32<br>Phe                 | S      | .           | .        | .           | <b>0.52</b> | .           | .           | 0.001  |
| 21770:G/<br>T <sup>a</sup>                  | p.Val70<br>Phe                 | S      | .           | .        | .           | .           | .           | <b>0.42</b> | <0.001 |
| 21852:A/<br>T                               | p.Lys97<br>Met                 | S      | .           | .        | .           | .           | <b>1</b>    | <b>0.51</b> | <0.001 |
| 21980:TT<br>TTT<br>GGGTG/<br>T <sup>c</sup> | p.Leu14<br>1_<br>Val143d<br>el | S      | .           | .        | .           | .           | <b>0.99</b> | <b>0.99</b> | <0.001 |
| 22131:G/<br>A                               | p.Arg19<br>0Lys                | S      | .           | .        | .           | .           | <b>1</b>    | <b>1</b>    | <0.001 |
| 22152:T/<br>C                               | p.Ile197<br>Thr                | S      | .           | .        | .           | <b>0.58</b> | .           | .           | <0.001 |
| 22195:T/<br>G                               | p.Asn21<br>1Lys                | S      | .           | .        | .           | .           | .           | <b>0.56</b> | <0.001 |
| 22843:T/<br>C                               | p.Asp42<br>7<br>Asp            | S      | .           | .        | .           | <b>0.52</b> | .           | .           | <0.001 |
| 22882:T/<br>A <sup>b</sup>                  | p.Asn44<br>0Lys                | S      | .           | .        | .           | .           | .           | <b>0.51</b> | <0.001 |
| 23010:T/<br>C                               | p.Val483<br>Ala                | S      | .           | .        | .           | .           | <b>1</b>    | <b>1</b>    | <0.001 |
| 23012:G/<br>C                               | p.Glu48<br>4Gln                | S      | .           | .        | .           | .           | <b>1</b>    | <b>0.45</b> | <0.001 |
| 23403:A/<br>G                               | p.Asp61<br>4Gly                | S      | <b>1</b>    | <b>1</b> | <b>1</b>    | <b>1</b>    | <b>1</b>    | <b>1</b>    | 0.920  |

|               |                      |                |             |             |             |             |             |             |        |
|---------------|----------------------|----------------|-------------|-------------|-------------|-------------|-------------|-------------|--------|
| 23638:C/<br>T | p.Ile692I<br>le      | S              | .           | .           | <b>0.97</b> | .           | .           | .           | 0.001  |
| 24885:A/<br>C | p.Asn11<br>08<br>Thr | S              | .           | .           | .           | .           | .           | <b>0.39</b> | <0.001 |
| 25563:G/<br>T | p.Gln57<br>His       | ORF3a          | <b>1</b>    | <b>0.99</b> | <b>0.99</b> | <b>1</b>    | <b>1</b>    | <b>1</b>    | 0.221  |
| 26228:C/<br>T | .                    | ORF3a-<br>E    | .           | .           | .           | <b>0.43</b> | .           | .           | 0.001  |
| 26333:C/<br>T | p.Thr30I<br>le       | E              | .           | .           | .           | .           | <b>1</b>    | <b>0.59</b> | <0.001 |
| 26386:A/<br>G | p.Asn48<br>Asp       | E              | .           | .           | .           | .           | <b>1</b>    | .           | <0.001 |
| 26393:G/<br>T | p.Ser50I<br>e        | E              | .           | .           | .           | .           | <b>0.96</b> | .           | <0.001 |
| 26895:C/<br>T | p.His125<br>Tyr      | M              | .           | .           | .           | .           | <b>1</b>    | <b>1</b>    | 0.002  |
| 27393:C/<br>T | .                    | ORF6-<br>ORF7a | .           | .           | .           | .           | <b>1</b>    | <b>1</b>    | <0.001 |
| 27925:C/<br>T | p.Thr11I<br>le       | ORF8           | .           | .           | .           | .           | <b>1</b>    | <b>0.89</b> | <0.001 |
| 28232:C/<br>T | p.Asp11<br>3<br>Asp  | ORF8           | .           | .           | .           | <b>0.32</b> | .           | .           | <0.001 |
| 28253:C/<br>T | p.Phe12<br>0<br>Phe  | ORF8           | .           | .           | <b>0.99</b> | .           | .           | .           | 0.005  |
| 28255:T/<br>C | p.Ile121<br>Thr      | ORF8           | <b>0.83</b> | <b>0.84</b> | .           | <b>0.77</b> | <b>0.86</b> | <b>0.79</b> | <0.001 |
| 28300:G/<br>T | p.Gln9H<br>is        | N              | .           | .           | <b>0.99</b> | .           | .           | .           | 0.003  |
| 28715:A/<br>G | p.Thr148<br>Ala      | N              | .           | .           | .           | .           | .           | <b>0.59</b> | <0.001 |
| 28887:C/<br>T | p.Thr205<br>Ile      | N              | <b>0.96</b> | <b>0.74</b> | <b>1</b>    | <b>0.61</b> | <b>1</b>    | <b>1</b>    | 0.008  |

<sup>a</sup> Val70Phe overlaps the  $\Delta$ 69-70 deletion which has been reported in the B.1.1.7 variant and has been associated with other receptor binding domain changes.<sup>4</sup>

<sup>b</sup> Asn440Lys was also reported by Weisblum et al. and Liu et al. by passaging SARS-CoV-2 in the presence of a monoclonal antibody. This mutation also emerged in an adult immunocompromised patient reported in Choi et al.<sup>2,5,6</sup>

<sup>c</sup> Leu141\_Val143del is in a region where similar mutations have been found in other immunocompromised patients.<sup>2,7</sup>

**Table S5. Confirmation of variant calls by alternate whole genome sequencing methods**  
Primary Paragon protocol was confirmed by either Ampliseq or Twist protocols.

| Sample            | Platform |
|-------------------|----------|
| Patient 1, Day 0  | Twist    |
| Patient 1, Day 13 | Ampliseq |
| Patient 1, Day 27 | n/a      |
| Patient 2, Day 0  | Twist    |
| Patient 2, Day 11 | Twist    |
| Patient 2, Day 18 | Twist    |
| Patient 2, Day 27 | Twist    |
| Patient 2, Day 40 | Ampliseq |
| Patient 2, Day 77 | Twist    |
| Patient 2, Day 92 | Twist    |



|                    |          |
|--------------------|----------|
| Patient 2, Day 99  | Twist    |
| Patient 2, Day 117 | Twist    |
| Patient 2, Day 120 | Twist    |
| Patient 2, Day 127 | AmpliSeq |
| Patient 2, Day 134 | Twist    |
| Patient 2, Day 137 | n/a      |
| Patient 2, Day 144 | n/a      |
| Patient 3, Day 0   | Twist    |
| Patient 3, Day 15  | AmpliSeq |
| Patient 3, Day 67  | Twist    |
| Patient 3, Day 68  | Twist    |
| Patient 3, Day 139 | AmpliSeq |
| Patient 3, Day 162 | Twist    |
